# Supplementary material for: Reprogramming of Fundamental miRNA and Gene Expression during the Barley-Piriformospora indica Interaction
Source: MDPI journal article supplement (doi:10.3390/jof9010024), 2022-12-23
Supplement: s1 [file s1]

Table S9. Down regulated targets mRNA in 7 dai vs. 3 dai

| miRNA         | log2 FC  | Target mRNA      | Function                                   |
|---------------|----------|------------------|--------------------------------------------|
| hvu-miR171-3p | -1.2508  | HORVU4Hr1G010490 | protein MIZU-KUSSEI 1                      |
|               |          | HORVU4Hr1G087700 | scarecrow-like protein 6                   |
|               |          | HORVU6Hr1G063650 | scarecrow-like protein 27                  |
|               |          | HORVU7Hr1G001300 | scarecrow-like protein 22                  |
| novel_1       | -0.70883 | HORVU2Hr1G101770 | growth-regulating factor 3-like            |
|               |          | HORVU6Hr1G068370 | growth-regulating factor 4-like isoform X1 |
|               |          | HORVU7Hr1G034610 | growth-regulating factor 2-like            |
|               |          | HORVU6Hr1G081210 | growth-regulating factor 1-like            |
|               |          | HORVU7Hr1G008680 | growth-regulating factor 5-like isoform X1 |
|               |          | HORVU0Hr1G016610 | growth-regulating factor 4-like isoform X2 |
