# Supplementary material for: Reprogramming of Fundamental miRNA and Gene Expression during the Barley-Piriformospora indica Interaction
Source: MDPI journal article supplement (doi:10.3390/jof9010024), 2022-12-23
Supplement: s1 [file s1]

3DAI\_vs\_Mock-miRNA\_Inc\_mRNA\_all\_network

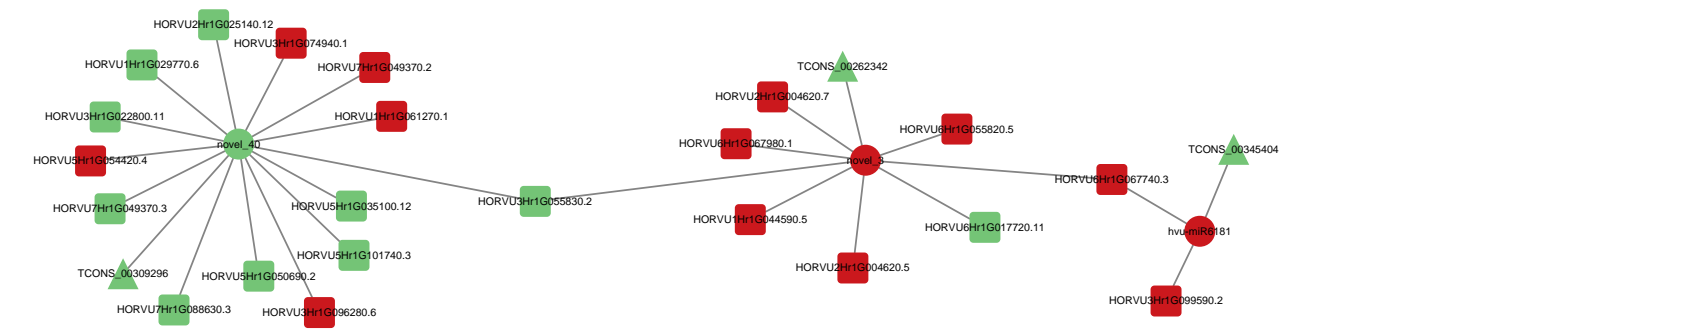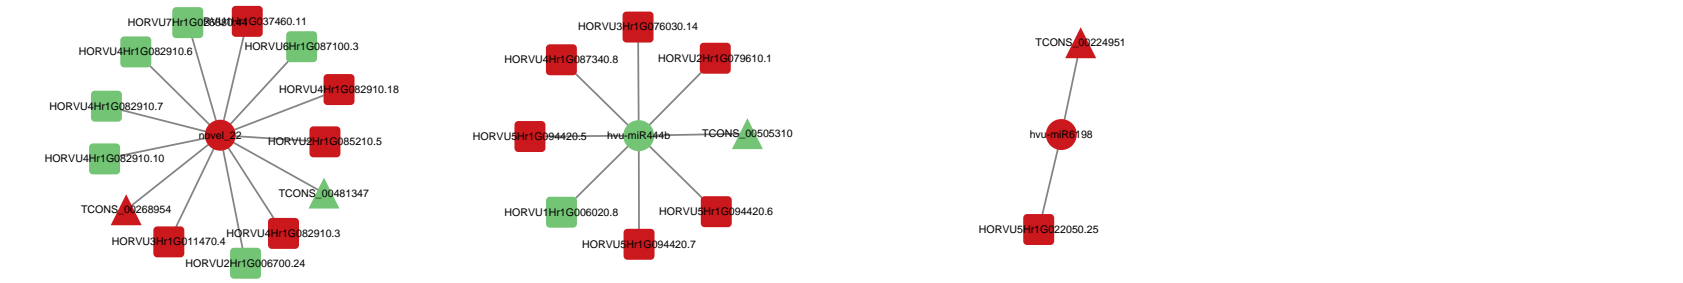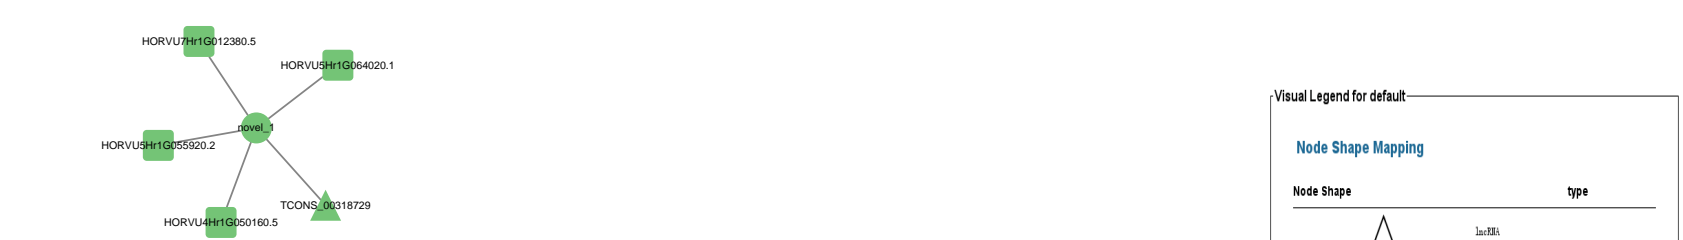

Visual Legend for default

**Node Shape Mapping**

| Node Shape                                                                            | type   |
|---------------------------------------------------------------------------------------|--------|
|  | lncRNA |
|  | mRNA   |
|  | miRNA  |

**Node Fill Color Mapping**

| Node Fill Color                                                                       | up_down |
|---------------------------------------------------------------------------------------|---------|
|  | down    |
|  | up      |
