# Supplementary material for: Reprogramming of Fundamental miRNA and Gene Expression during the Barley-Piriformospora indica Interaction
Source: MDPI journal article supplement (doi:10.3390/jof9010024), 2022-12-23
Supplement: s1 [file s1]

Table S4. miRNA libraries quality

| Library          | Sample   | Reads    | Bases  | Error<br>rate | Q20    | Q30    | GC<br>content |
|------------------|----------|----------|--------|---------------|--------|--------|---------------|
| FRRN202116035-1a | Mock_1   | 18215949 | 0.911G | 0.01%         | 99.45% | 98.02% | 52.51%        |
| FRRN202116035-2a | Mock_2   | 13103745 | 0.655G | 0.01%         | 99.51% | 98.11% | 51.89%        |
| FRRN202116035-3a | Mock_3   | 14607079 | 0.730G | 0.01%         | 99.22% | 96.95% | 52.57%        |
| Hv3DAI_1         | Hv3DAI_1 | 13944721 | 0.697G | 0.01%         | 99.47% | 97.93% | 53.05%        |
| Hv3DAI_2         | Hv3DAI_2 | 19256439 | 0.963G | 0.01%         | 99.42% | 97.74% | 51.50%        |
| Hv3DAI_3         | Hv3DAI_3 | 13473809 | 0.674G | 0.01%         | 99.37% | 97.47% | 51.17%        |
| Hv7DAI_1         | Hv7DAI_1 | 12872083 | 0.644G | 0.01%         | 99.30% | 97.37% | 51.68%        |
| Hv7DAI_2         | Hv7DAI_2 | 12244274 | 0.612G | 0.01%         | 99.47% | 97.91% | 52.55%        |
| Hv7DAI_3         | Hv7DAI_3 | 17942083 | 0.897G | 0.01%         | 99.40% | 97.73% | 53.34%        |
