# Supplementary material for: Reprogramming of Fundamental miRNA and Gene Expression during the Barley-Piriformospora indica Interaction
Source: MDPI journal article supplement (doi:10.3390/jof9010024), 2022-12-23
Supplement: s1 [file s1]

Table S7. Up-regulated and down regulated targets mRNA in 3 dai vs. Mock

| up-regulated targets mRNA |            |                      |                                                 | down regulated targets mRNA |              |                      |                                                                              |
|---------------------------|------------|----------------------|-------------------------------------------------|-----------------------------|--------------|----------------------|------------------------------------------------------------------------------|
| miRNA                     | log2<br>FC | Target mRNA          | Function                                        | miRNA                       | log2<br>FC   | Target mRNA          | Function                                                                     |
| hvu-miR5<br>049a          | 1.27<br>8  |                      | Serine/threonine                                |                             |              | HORVU6Hr1G           | MADS-box                                                                     |
|                           |            | HORVU1Hr1G<br>091240 | -protein kinase<br>STY13                        | hvu-miR<br>444b             | -1.4939      | 073040               | transcription factor<br>57                                                   |
|                           |            | HORVU2Hr1G<br>078270 | protein<br>LURP-one-relat<br>ed 6               |                             |              | HORVU1Hr1G<br>080480 | 6-phosphogluconate<br>dehydrogenase                                          |
|                           |            |                      |                                                 |                             |              | HORVU3Hr1G<br>039220 | pyruvate kinase,<br>cytosolic. isozyme                                       |
|                           |            |                      |                                                 |                             |              | HORVU3Hr1G<br>067470 | 26S proteasome<br>regulatory<br>subunit 6B<br>homolog                        |
|                           |            | HORVU2Hr1G<br>096290 | thioredoxin-like<br>3-3 isoform X1              | hvu-miR<br>1120             | -0.78<br>071 | HORVU4Hr1G<br>002170 | general negative<br>regulator of<br>transcription<br>subunit 3 isoform<br>X4 |
|                           |            | HORVU5Hr1G<br>060310 | putative<br>transcription<br>factor RL9         |                             |              | HORVU7Hr1G<br>030930 | AUGMIN subunit 3                                                             |
|                           |            | HORVU6Hr1G<br>025780 | protein<br>argonaute 1B                         |                             |              | HORVU2Hr1G<br>101770 | growth-regulating<br>factor 3-like                                           |
|                           |            | HORVU5Hr1G<br>112710 | leucine rich<br>repeat family<br>expressed      |                             |              | HORVU6Hr1G<br>068370 | growth-regulating<br>factor 4-like<br>isoform X1                             |
|                           |            | HORVU6Hr1G<br>083120 | 60S ribosomal<br>protein L35a-1                 |                             |              | HORVU7Hr1G<br>034610 | growth-regulating<br>factor 2-like                                           |
|                           |            |                      |                                                 |                             |              | HORVU6Hr1G<br>081210 | growth-regulating<br>factor 1-like                                           |
|                           |            | HORVU3Hr1G<br>094730 | squamosa<br>promoter-bindin<br>g-like protein 2 | novel_1                     | -0.9096<br>4 | HORVU7Hr1G<br>008680 | growth-regulating<br>factor 5-like<br>isoform X1                             |
|                           | 1.54<br>32 | HORVU6Hr1G<br>028980 | reductase 1                                     |                             |              | HORVU0Hr1G<br>016610 | growth-regulating<br>factor 4-like<br>isoform X2                             |
| novel_22                  |            | HORVU6Hr1G           | squamosa                                        |                             |              |                      |                                                                              |

|                   |      |            |                                         |
|-------------------|------|------------|-----------------------------------------|
| hvu-miR1<br>71-3p |      | 031450     | promoter-bindin<br>g-like protein 4     |
|                   |      | HORVU0Hr1G | squamosa                                |
|                   |      | 039170     | promoter-bindin<br>g-like protein<br>16 |
|                   |      | HORVU4Hr1G | protein                                 |
|                   |      | 010490     | MIZU-KUSSEI<br>1                        |
|                   | 1.16 | HORVU4Hr1G | scarecrow-like                          |
|                   | 18   | 087700     | protein 6                               |
|                   |      | HORVU6Hr1G | scarecrow-like                          |
|                   |      | 063650     | protein 27                              |
|                   |      | HORVU7Hr1G | scarecrow-like                          |
|                   |      | 001300     | protein 22                              |
