# Supplementary material for: Reprogramming of Fundamental miRNA and Gene Expression during the Barley-Piriformospora indica Interaction
Source: MDPI journal article supplement (doi:10.3390/jof9010024), 2022-12-23
Supplement: s1 [file s1]

7DAI\_vs\_Mock-miRNA\_Inc\_mRNA\_all\_network

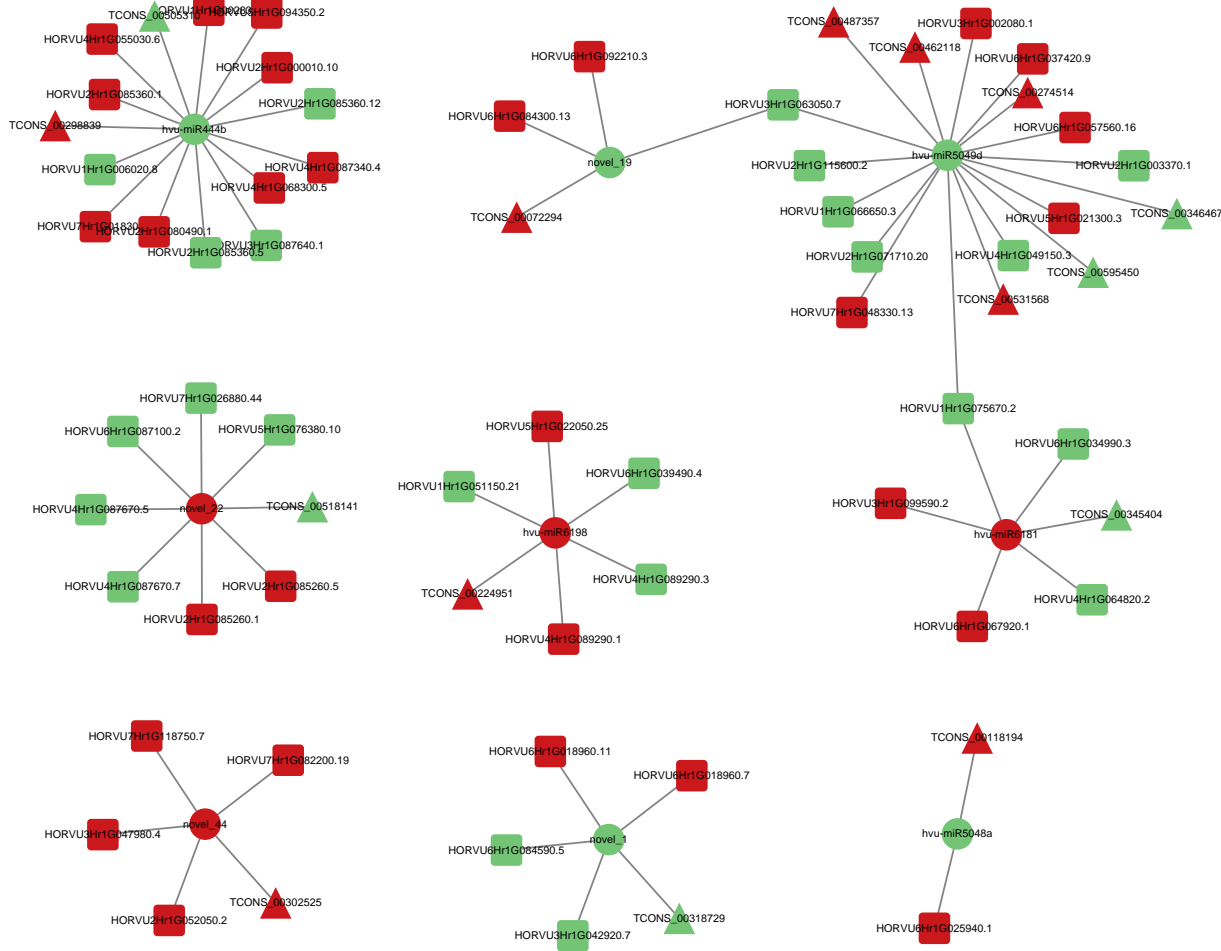

Visual Legend for default

| Node Shape Mapping                                                                    |         |
|---------------------------------------------------------------------------------------|---------|
| Node Shape                                                                            | type    |
|  | miRNA   |
|  | mRNA    |
|  | novel   |
| Node Fill Color Mapping                                                               |         |
| Node Fill Color                                                                       | up_down |
|  | down    |
|  | up      |
