# Supplementary material for: Reprogramming of Fundamental miRNA and Gene Expression during the Barley-Piriformospora indica Interaction
Source: MDPI journal article supplement (doi:10.3390/jof9010024), 2022-12-23
Supplement: s1 [file s1]

Table S1. Total reads in mock library

| Statu           |           |        | Total<br>reads | Total bases<br>(bp) | Uniq<br>reads | Uniq<br>(bp) |
|-----------------|-----------|--------|----------------|---------------------|---------------|--------------|
| Total           | Mapped    | small  | 7798928        | 17552038            | 107050        | 24931927     |
| RNA             |           |        |                | 0                   | 1             |              |
| Total           | Sense     | Mapped | 6965304        | 15642631            | 674937        | 15723526     |
| small RNA       |           |        |                | 5                   |               |              |
| Total           | Antisense | Mapped | 833624         | 19094065            | 395564        | 9208401      |
| small RNA       |           |        |                |                     |               |              |
| Total small RNA |           |        | 8164582        | 18388802            | 124317        | 28967277     |
|                 |           |        |                | 2                   | 4             |              |

Table S2. Total reads in 3 dai library

| Statu           |           |        |         | Total bases | Uniq   | Uniq     | bases |
|-----------------|-----------|--------|---------|-------------|--------|----------|-------|
|                 |           |        |         | Total (bp)  | reads  | (bp)     |       |
|                 |           |        |         | reads       |        |          |       |
| Total           | Mapped    | small  | 6418039 |             |        |          |       |
| RNA             |           |        |         | 14875589    | 565024 | 13370541 |       |
|                 |           |        |         | 9           |        |          |       |
| Total           | Sense     | Mapped | 5954841 | 13790455    | 355604 |          |       |
| small RNA       |           |        |         | 7           |        | 8412915  |       |
| Total           | Antisense | Mapped | 463198  | 10851342    | 209420 |          |       |
| small RNA       |           |        |         |             |        | 4957626  |       |
| Total small RNA |           |        |         |             | 666591 |          |       |
|                 |           |        | 6627084 | 15359478    |        | 15773408 |       |
|                 |           |        |         | 4           |        |          |       |

Table S3. Total reads in 7 dai library

| Statu           |           |        | Total<br>reads | Total bases<br>(bp) | Uniq<br>reads | Uniq<br>(bp) |
|-----------------|-----------|--------|----------------|---------------------|---------------|--------------|
| Total           | Mapped    | small  | 7136192        | 16966228            | 598323        | 14271709     |
| RNA             |           |        |                | 0                   |               |              |
| Total           | Sense     | Mapped | 6593838        | 15680031            | 368695        | 8785285      |
| small RNA       |           |        |                | 1                   |               |              |
| Total           | Antisense | Mapped | 542354         | 12861969            | 229628        | 5486424      |
| small RNA       |           |        |                |                     |               |              |
| Total small RNA |           |        | 7713820        | 18351173            | 739715        | 17636746     |
|                 |           |        |                | 4                   |               |              |
