# Supplementary material for: Reprogramming of Fundamental miRNA and Gene Expression during the Barley-Piriformospora indica Interaction
Source: MDPI journal article supplement (doi:10.3390/jof9010024), 2022-12-23
Supplement: s1 [file s1]

Table S5. Primers of target genes and miRNAs used for QPCR.

| mRNA Seq-ID            | Primer sequence                           | miRNA    | Primer sequence                        |
|------------------------|-------------------------------------------|----------|----------------------------------------|
| HORVU7Hr1G0123<br>80.5 | Forward5'-<br>CGAACAAACAGACGA<br>CAAGC-3' | Novel 1  | Forward5'-<br>AGGTGTCCGAAAGAACTTGA-3'  |
|                        | Reverse5'-<br>CTGGAGCTGGATGAG<br>G-3'     |          | Reverse5'-<br>TTGAACTGCTCAACTGAATT-3'  |
|                        | Forward5'-<br>AAGGGATCCAACCCAA<br>AATC-3' |          |                                        |
|                        | Reverse5'-<br>GGACGGCTTGGTACTC<br>TCTG-3' |          |                                        |
| HORVU5Hr1G0055<br>920  | Forward5'-<br>CTGGGAGGGTAATCAG<br>CAAA-3' | mir444b  | Forward5'-<br>ACGTCAACGACAGAGTTCTGA-3' |
|                        | Reverse5'-<br>CGACGAGAGAGAAGGT<br>ACGG-3' |          | Reverse5'-<br>TCAAGCTTCTCAACTGAATT-3'  |
|                        | Forward5'-<br>CGCAGTTCCTCTTCAGC<br>TTC-3' |          |                                        |
|                        | Reverse5'-<br>GAAACCAAACAGGCCT<br>GAAA-3' |          |                                        |
| HORVU3Hr1G0760<br>30   | Forward5'-<br>GACTGCTTTCGGCTAG<br>GTTG-3' | Novel_22 | Forward5'-<br>GACTGTCTTCTCTCACTCGT-3'  |
|                        | Reverse5'-<br>TTGACCTTGCCTTTCTG<br>CTT-3' |          | Reverse5'-<br>GTGAGCACCTCAACTGAATT-3'  |
|                        | Forward5'-<br>TTGCAGCAATTGTTGA<br>GAGG-3' |          |                                        |
|                        | Reverse5'-<br>CGCTGTGGCAATAGAC<br>TTCA-3' |          |                                        |
| HORVU4Hr1G0829<br>10   | Forward5'-<br>CTGCGGTGGATCAACT<br>ACCT-3' | Novel_40 | Forward5'-<br>AAGGTGTTCGAAAGAACTTGA-3' |
|                        |                                           |          | Reverse5'-<br>TTGAACTTCTCAACTGAATT-3'  |
|                        |                                           |          |                                        |
|                        |                                           |          |                                        |
| HORVU5Hr1G0060<br>20.8 |                                           | Novel_22 |                                        |
|                        |                                           |          |                                        |
|                        |                                           |          |                                        |
|                        |                                           |          |                                        |
| HORVU5Hr1G0544<br>20.4 |                                           | Novel_40 |                                        |
|                        |                                           |          |                                        |
|                        |                                           |          |                                        |
|                        |                                           |          |                                        |

---

|                |                   |
|----------------|-------------------|
|                | Reverse5'-        |
|                | TGGTTGTGAGCCTGTG  |
|                | ACTC-3'           |
|                | Reverse5'-        |
|                | CTCCGGCTACTCACTCC |
| HORVU7Hr1G0886 | AAG-3'            |
| 30             | Reverse5'-        |
|                | TGCTGAAGTGGTCTTG  |
|                | ATCG-3'           |

---
