# Supplementary material for: Reprogramming of Fundamental miRNA and Gene Expression during the Barley-Piriformospora indica Interaction
Source: MDPI journal article supplement (doi:10.3390/jof9010024), 2022-12-23
Supplement: s1 [file s1]

Table S8. Up-regulated and down regulated targets mRNA in 7 dai vs. Mock

| up-regulated targets mRNA |         |             |                                                                 | down regulated targets mRNA |         |             |                                                                  |
|---------------------------|---------|-------------|-----------------------------------------------------------------|-----------------------------|---------|-------------|------------------------------------------------------------------|
| miRNA                     | log2 FC | Target mRNA | Function                                                        | miRNA                       | log2 FC | Target mRNA | Function                                                         |
|                           |         | HORVU4Hr1   | vacuolar                                                        |                             |         | HORVU1Hr1G  | 6-phosphogluconate                                               |
|                           |         | G056200     | protein-sorting-associated protein 37 homolog 1-like isoform X3 |                             |         | 080480      | dehydrogenase                                                    |
| novel_41                  | 1.3484  | HORVU6Hr1   | probable                                                        |                             |         | HORVU3Hr1G  | pyruvate kinase, cytosolic.                                      |
|                           |         | G039740     | serine/threonine-protein kinase SIS8                            | hvu-mi R1120                | -1.5238 | 039220      | isozyme                                                          |
|                           |         | HORVU5Hr1   | nucleolar protein 12                                            |                             |         | HORVU3Hr1G  | 26S proteasome regulatory subunit 6B homolog                     |
|                           |         | G123680     |                                                                 |                             |         | 067470      |                                                                  |
| novel_22                  |         | HORVU3Hr1   | squamosa                                                        |                             |         | HORVU4Hr1G  | general negative regulator of transcription subunit 3 isoform X4 |
|                           |         | G094730     | promoter-binding-like protein 2                                 |                             |         | 002170      |                                                                  |
|                           |         | HORVU6Hr1   | cinnamoyl-CoA reductase 1                                       |                             |         | HORVU7Hr1G  | AUGMIN subunit 3                                                 |
|                           |         | G028980     |                                                                 |                             |         | 030930      |                                                                  |
|                           | 1.5998  | HORVU6Hr1   | squamosa                                                        |                             |         | HORVU6Hr1G  | MADS-box transcription factor                                    |
|                           |         | G031450     | promoter-binding-like protein 4                                 | hvu-mi R444b                | -2.1964 | 073040      | 57                                                               |
|                           |         | HORVU0Hr1   | squamosa                                                        |                             |         | HORVU1Hr1G  | transcription initiation factor                                  |
|                           |         | G039170     | promoter-binding-like protein 16                                |                             |         | 000620      | TFIID subunit 6                                                  |
|                           |         |             |                                                                 |                             |         | HORVU3Hr1G  | rust resistance kinase Lr10-like                                 |
|                           |         |             |                                                                 |                             |         | 002080      |                                                                  |
|                           |         |             |                                                                 |                             |         | HORVU3Hr1G  | probable isoprenylcysteine                                       |
|                           |         |             |                                                                 |                             |         | 057530      | alpha-carbonyl methyltransferase                                 |
|                           |         |             |                                                                 | hvu-mi R5049d               | -1.5549 |             | ICMEL2 isoform X1                                                |
|                           |         |             |                                                                 |                             |         | HORVU4Hr1G  | probable                                                         |
|                           |         |             |                                                                 |                             |         | 025080      | serine/threonine-protein kinase PBL25                            |
|                           |         |             |                                                                 |                             |         | HORVU7Hr1G  | probable                                                         |
|                           |         |             |                                                                 |                             |         | 021720      | alpha-1,6-mannosyltransferase                                    |
|                           |         |             |                                                                 |                             |         |             | MNN10                                                            |
|                           |         |             |                                                                 |                             |         | HORVU7Hr1G  | hypothetical protein                                             |
|                           |         |             |                                                                 |                             |         | 020580      | CFC21_095876                                                     |
